# Supplementary material
Source: publisher figshare collection journal article supplement (https://springernature.figshare.com/ndownloader/files/13837343)
Supplement: Supplementary file 1 [file 13837343]

## Classification of agricultural and environmental outcomes to be included in the systematic map

We will use this provisional classification for coding (via drop-down menus in our data-entry forms). A secondary objective of this map is to test the usability of this classification, and we will discuss the classification itself in a future publication, if it seems useful for future systematic maps. If possible, studies will be classified at one of the levels with bullet points (“n.e.c.” = not elsewhere classified).

1. **Crops**
   1. Crop yield (including cash crops and cover crops)
      - *Crop yield*
        - *Crop biomass (including inedible components; e.g., the stems of some crops)*
        - *Crop propagules (including cuttings and seeds not used for food, feed, fuel, etc.)*
        - *Crop yield (including harvest index; also see "land" for land equivalency)*
      - *Crop yield, n.e.c.*
   2. Crop quality (including cash crops and cover crops)
      - *Crop appearance (including the size and shape of the edible parts)*
      - *Crop cooking quality*
      - *Crop storage quality*
      - *Crop taste (including acidity, texture, etc.)*
      - *Ash content of crops*
      - *Dry matter content of crops (also see "Crop yield" for dry matter yield)*
      - *Fibre content of crops*
      - *Toxins in crops*
        - *Agrochemicals in crops (e.g., pesticide residues)*
        - *Heavy metals in crops (e.g., lead [Pb], mercury [Hg], or zinc [Zn])*
        - *Toxins in crops, n.e.c. (e.g., cyanide)*
      - *Chemical elements in crops*
        - *Carbon (not including soil organic carbon)*
        - *Plant macronutrients*
          - *Nitrogen (N) in plants (including biological nitrogen fixation)*
          - *Phosphorus (P) in plants*
          - *Potassium (K) in plants*
      - *Nutrients in crops*
        - *Calories*
        - *Micronutrients*
          - *Minerals*
          - *Vitamins*
        - *Macronutrients*
          - *Fat*
          - *Protein*
          - *Starch*
          - *Sugar*
      - *Crop quality, n.e.c.*
   3. Crop damage (also see "pathogens, pests, and weeds")
      - *Crop damage or infection by pathogens (e.g., disease severity)*
      - *Crop damage by pests*
      - *Crop damage by weeds*
      - *Crop damage, n.e.c.*
   4. Crop growth and survival
      - *Crop growth*
        - *Plant growth rate (e.g., photosynthetic rate)*
        - *Plant size (e.g., canopy cover, ground cover, leaf area index [LAI], or height)*
      - *Crop survival (e.g., germination rate)*
2. **Soil**
   1. Soil structure and function
      - *Soil aggregation and erosion*
        - *Soil aggregation*
        - *Soil erosion (including soil loss through harvesting)*
      - *Soil compaction, porosity, and water content*
        - *Soil compaction*
          - *Soil bulk density*
          - *Soil porosity/infiltration rates*
        - *Soil water content*
      - *Soil chemistry*
        - *Soil salinity (including sodium [Na])*
        - *Cation exchange capacity (CEC)*
        - *Electrical conductivity (EC)*
        - *Soil pH*
      - *Soil elements*
        - *Soil organic matter (SOM) and soil carbon (C)*
          - *Soil inorganic carbon*
          - *Soil organic carbon (SOC)*
          - *Soil organic matter (SOM)*
          - *Soil total carbon*
        - *Soil micronutrients and secondary nutrients (e.g., calcium [Ca] and magnesium [Mg])*
        - *Soil macronutrients*
          - *Nitrogen (N, including ammonium [NH4+] and nitrate [NO3-] in soils*
          - *Phosphorus (P) in soils*
          - *Potassium (K) in soils*
        - *Soil mineralization (decomposition from organic to inorganic forms)*
        - *Soil nutrient leaching (including nitrate leaching [NO3-])*
      - *Soil respiration (also see "pollutants (including greenhouse gases)")*
      - *Soil temperature*
      - *Soil texture (i.e. sand, silt, and clay content)*
      - *Soil structure and function, n.e.c.*
   2. Soil organisms (also see "biodiversity" and "pathogens, pest, and weeds")
      - *Soil microbes (not including pathogens), n.e.c.*
        - *Bacteria (including nitrogen-fixing bacteria)*
        - *Fungi (including mycorrhizae)*
        - *Soil enzymes*
        - *Soil microbial biomass*
      - *Earthworms*
      - *Nematodes (not including pests)*
      - *Soil organisms, n.e.c.*
3. **Water**
   1. Water use/loss
      - *Irrigation*
      - *Evapotranspiration*
      - *Runoff*
      - *Drainage*
      - *Water use/loss, n.e.c.*
4. **Pathogens, pests, and weeds**
   1. Pathogens
      - *Pathogens (bacteria)*
      - *Pathogens (fungi)*
      - *Pathogens (viruses)*
      - *Pathogens, n.e.c.*
   2. Pests
      - *Pests (invertebrates)*
      - *Pests (vertebrates)*
      - *Pests, n.e.c.*
   3. Weeds
      - *Weeds, n.e.c.*
5. **Pollutants (including greenhouse gases)**
   1. Greenhouse gases
      - *Carbon dioxide*
      - *Methane*
      - *Nitrous oxide*
   2. Air pollution
      - *Particulate matter (including dust)*
      - *Air pollution, n.e.c.*
   3. Soil pollution
      - *Biocides in soils (e.g., herbicides/pesticides)*
      - *Heavy metals in soils*
      - *Soil pollution, n.e.c.*
   4. Water pollution
      - *Anoxia and eutrophication*
      - *Biocides in water (e.g., herbicides/pesticides)*
      - *Nitrates in water*
      - *Sediments in water*
      - *Water pollution, n.e.c.*
6. **Chemicals and energy**
   1. Agrochemicals
      - *Biocides (e.g., herbicides/pesticides)*
      - *Fertilizers and other soil amendments*
      - *Agrochemicals, n.e.c.*
   2. Energy
      - *Electricity*
      - *Fuel (e.g., tractor fuel)*
      - *Energy, n.e.c.*
7. **Money, labor, and time**
   1. Money
      - *Money, n.e.c.*
   2. Labor
      - *Animal labor*
      - *Human labor*
      - *Labor, n.e.c.*
   3. Time
      - *Time, n.e.c.*
8. **Land**
   1. Agricultural land
      - *Agricultural land use (e.g., land equivalency ratio [LER])*
      - *Agricultural land, n.e.c.*
   2. Semi-natural land
      - *Semi-natural land use (e.g., area conserved)*
      - *Semi-natural land, n.e.c.*
9. **Wildlife (including pollinators and natural enemies)**
   1. Animals (not including livestock)
      - *Amphibians*
        - *Amphibian abundance*
          - *Abundance of amphibians as natural enemies of crop pests*
        - *Amphibian diversity*
          - *Diversity of amphibians as natural enemies of crop pests*
      - *Birds*
        - *Bird abundance*
          - *Abundance of birds as crop pollinators*
          - *Abundance of birds as natural enemies of crop pests*
        - *Bird diversity*
          - *Diversity of birds as crop pollinators*
          - *Diversity of birds as natural enemies of crop pests*
      - *Invertebrates (including insects and other arthropods)*
        - *Invertebrate abundance*
          - *Abundance of invertebrates as crop pollinators*
          - *Abundance of invertebrates as natural enemies of crop pests*
        - *Invertebrate diversity*
          - *Diversity of invertebrates as crop pollinators*
          - *Diversity of invertebrates as natural enemies of crop pests*
      - *Mammals*
        - *Mammal abundance*
          - *Abundance of mammals as crop pollinators*
          - *Abundance of mammals as natural enemies of crop pests*
        - *Mammal diversity*
          - *Diversity of mammals as crop pollinators*
          - *Diversity of mammals as natural enemies of crop pests*
      - *Reptiles*
        - *Reptile abundance*
          - *Abundance of reptiles as natural enemies of crop pests*
        - *Reptile diversity*
          - *Diversity of reptiles as natural enemies of crop pests*
      - *Animals, n.e.c.*
   2. Plants (not including crops)
      - *Grasses*
        - *Grass abundance*
        - *Grass diversity*
      - *Forbs*
        - *Forb abundance*
        - *Forb diversity*
      - *Shrubs*
        - *Shrub abundance*
        - *Shrub diversity*
      - *Trees*
        - *Tree abundance*
        - *Tree diversity*
      - *Plants, n.e.c.*
   3. Fungi (not including crops, mycorrhizae, etc.)
      - *Mushrooms*
        - *Mushroom abundance*
        - *Mushroom diversity*
      - *Fungi, n.e.c.*
